# Supplementary material for: Elevated LINC00909 Promotes Tumor Progression of Ovarian Cancer via Regulating the miR‐23b‐3p/MRC2 Axis
Source: Hindawi journal article supplement (doi:10.1155/2021/5574130), 2021-01-01

**Fig. S1 LINC00909 expression is elevated in tumors and serum of OV patients**

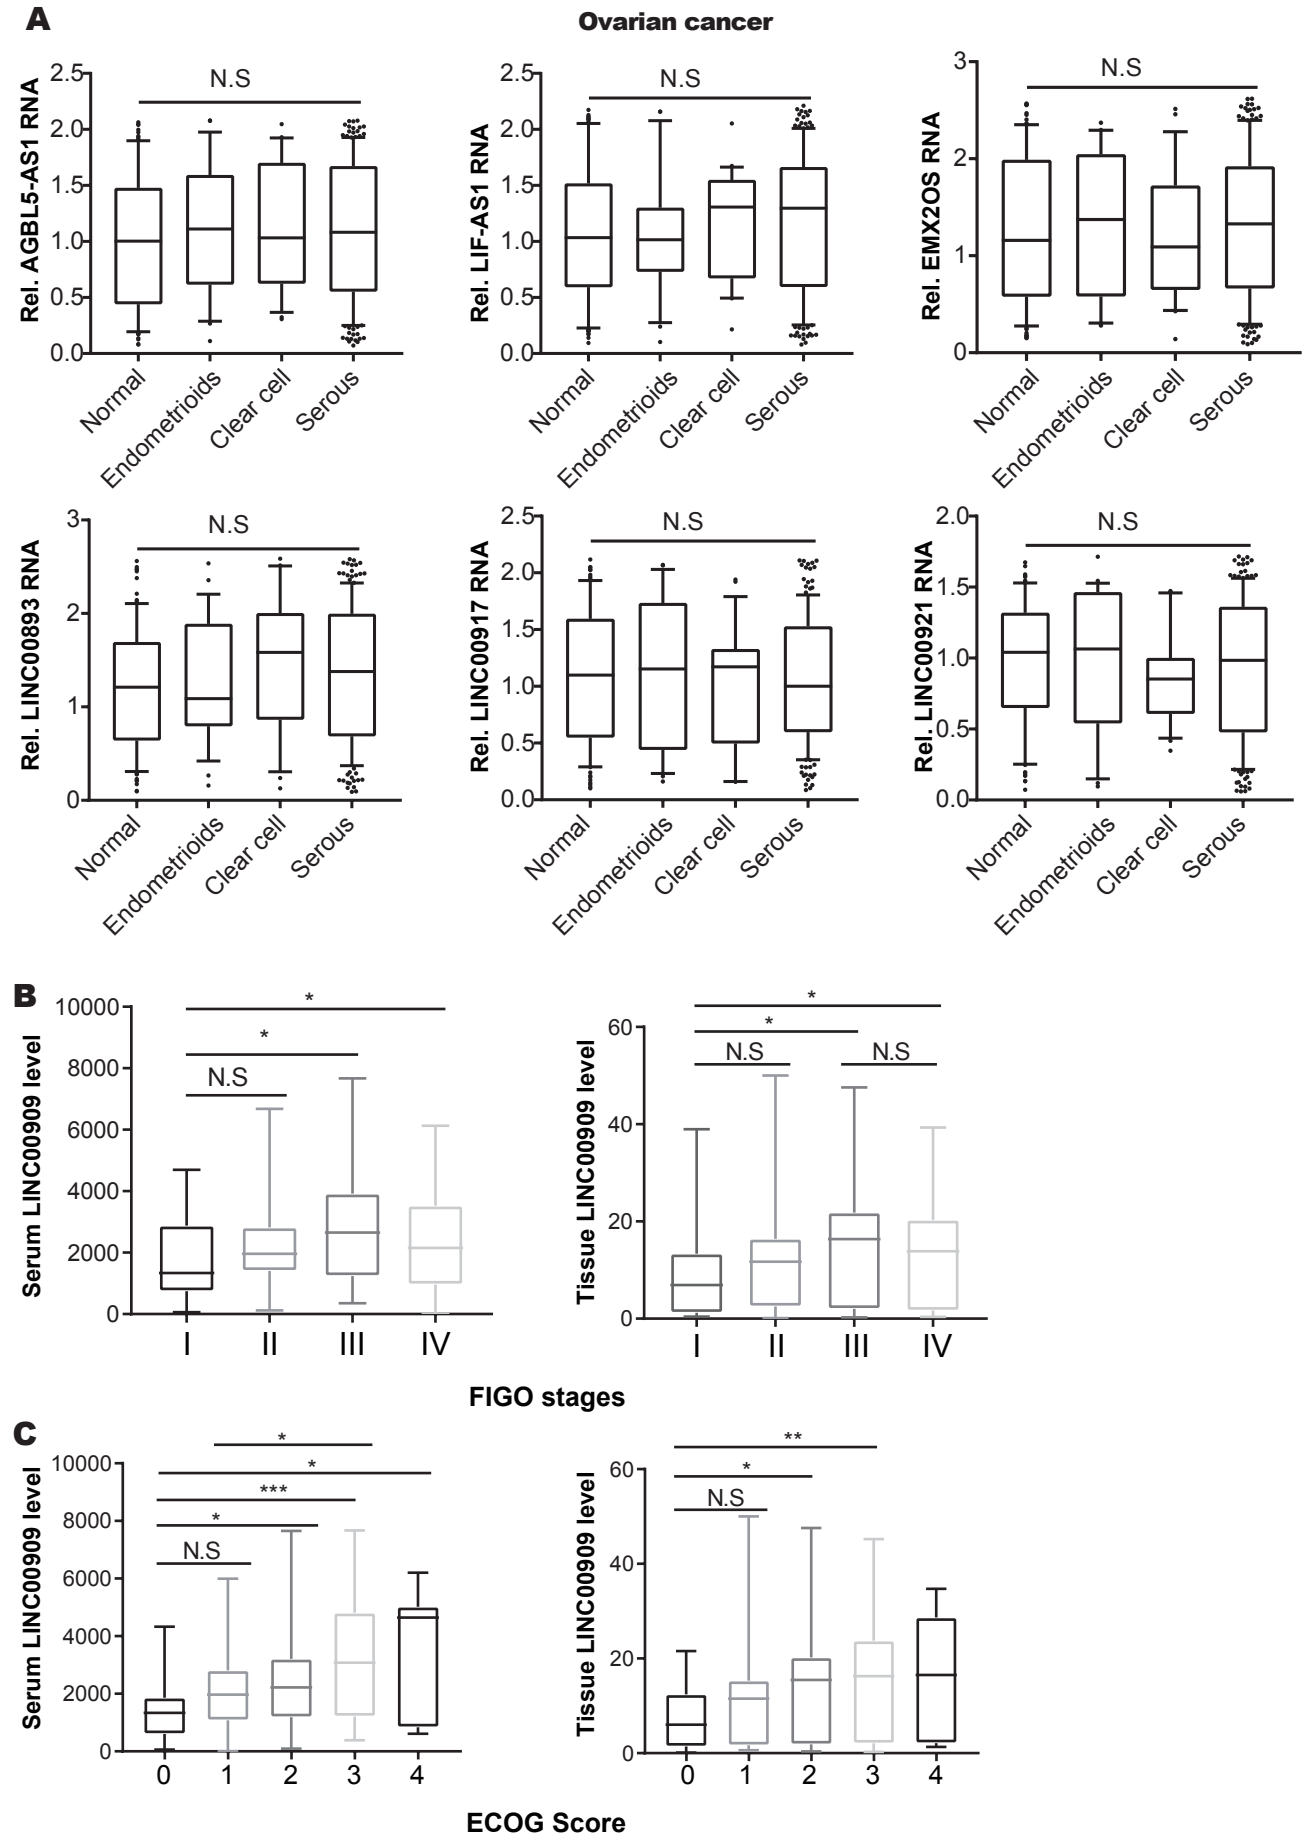

**Fig. S2 LINC00909 is essential for the migration of ovarian carcinoma cells**

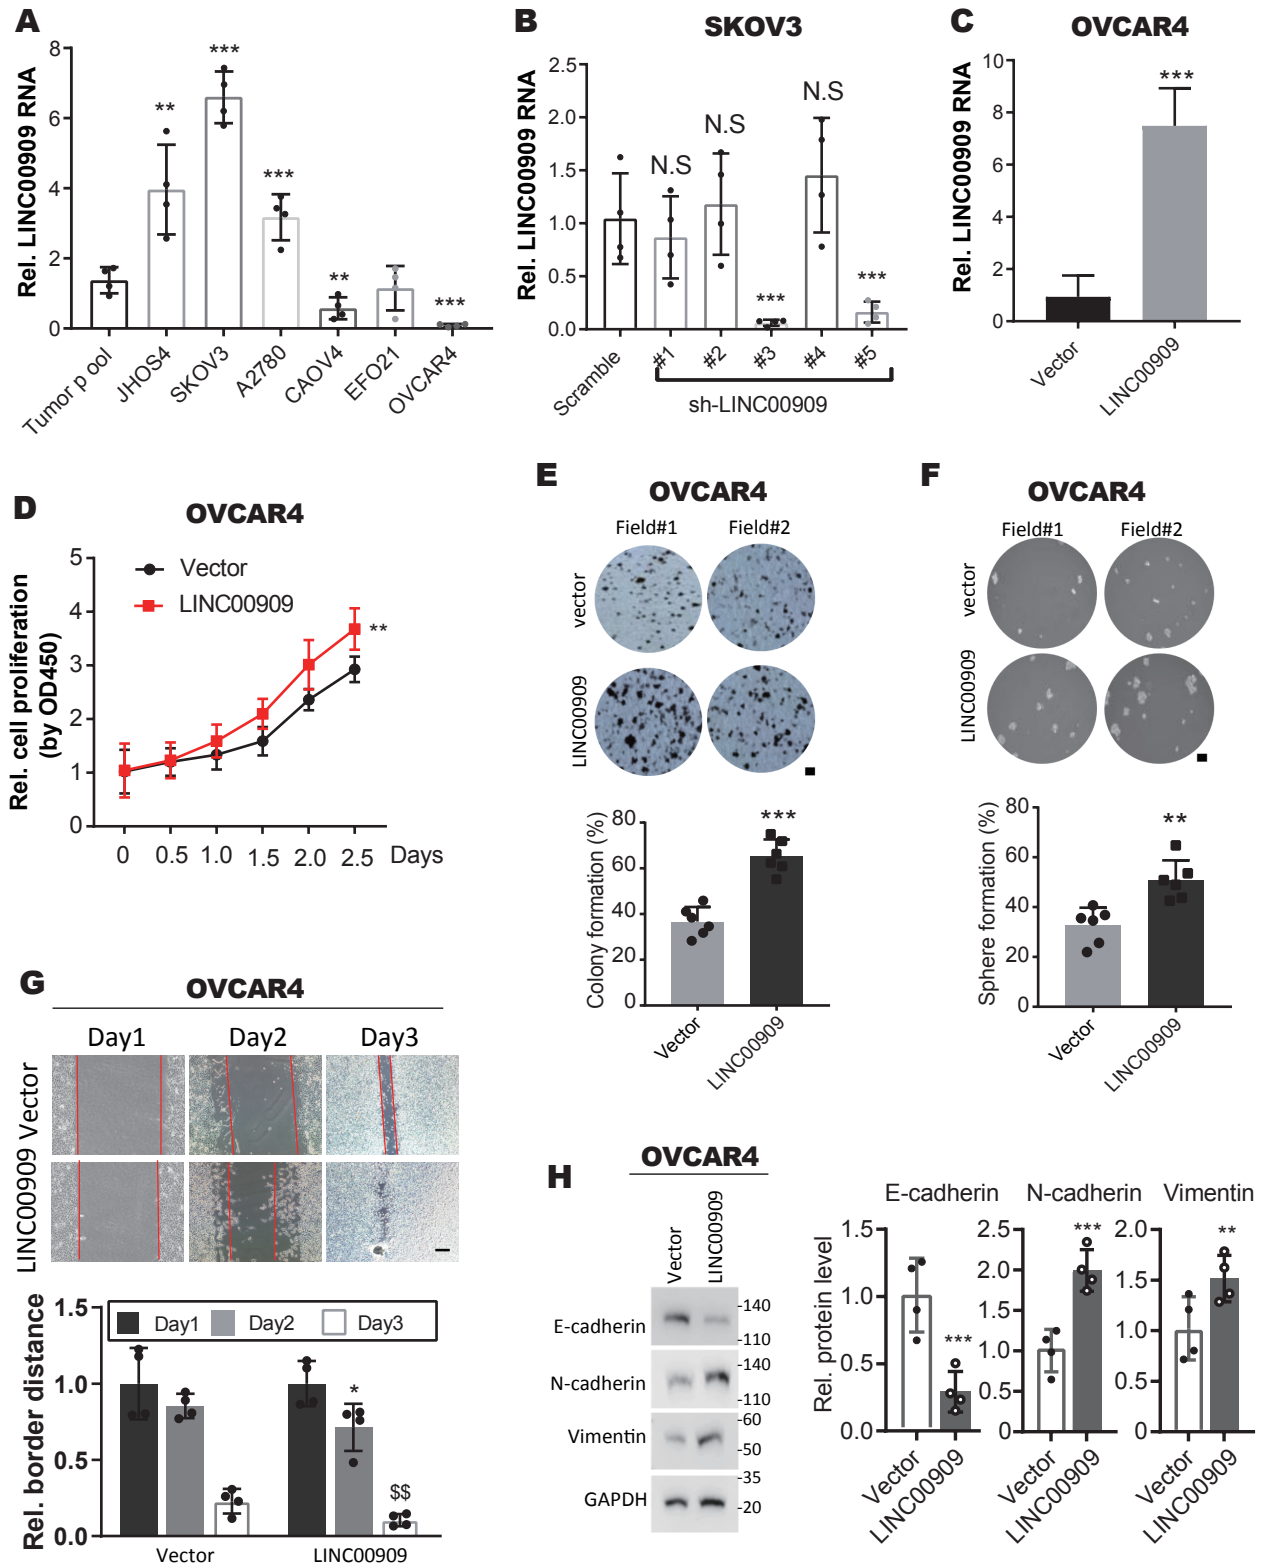

**Fig. S3 miR-23b is a critical functional mediator of LINC00909**

**A**

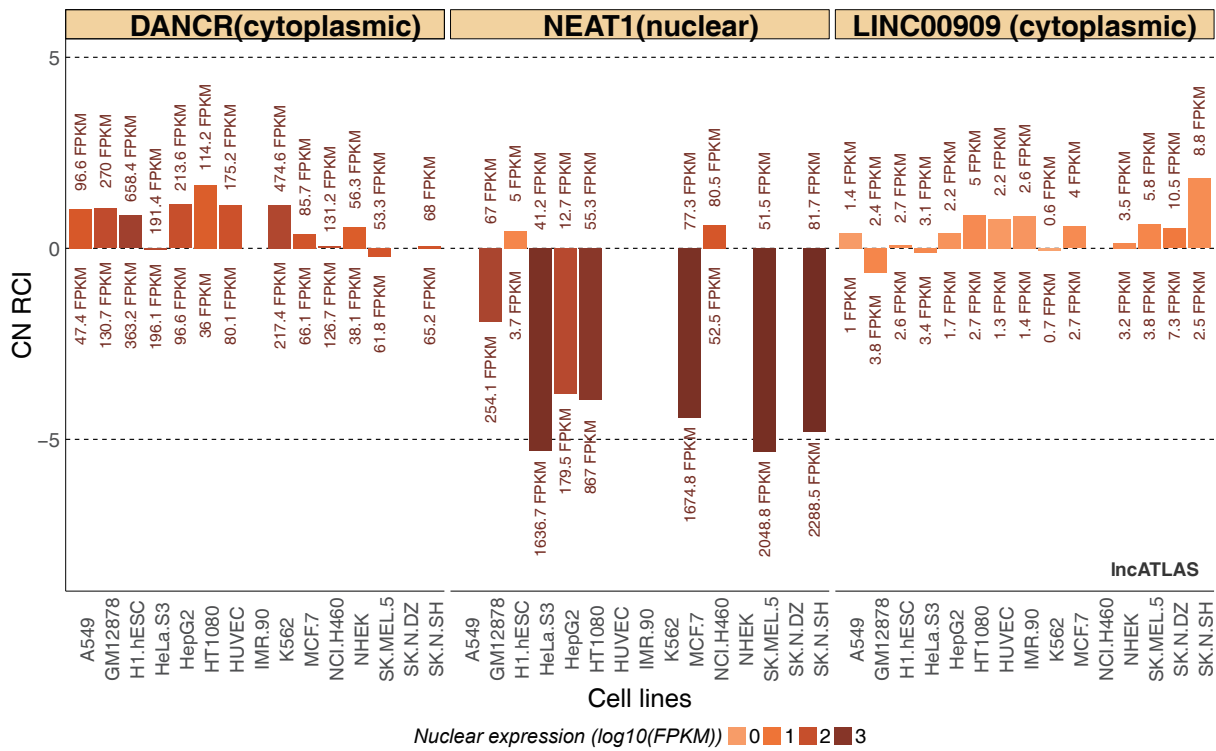

**B**

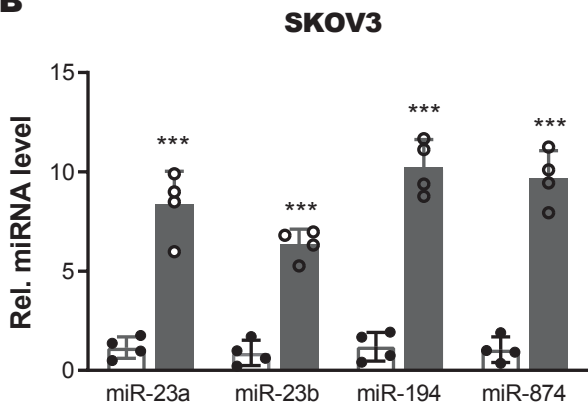

**Fig. S4 LINC00909 serves as a ceRNA by sponging miR-23b in ovarian cancer cells**

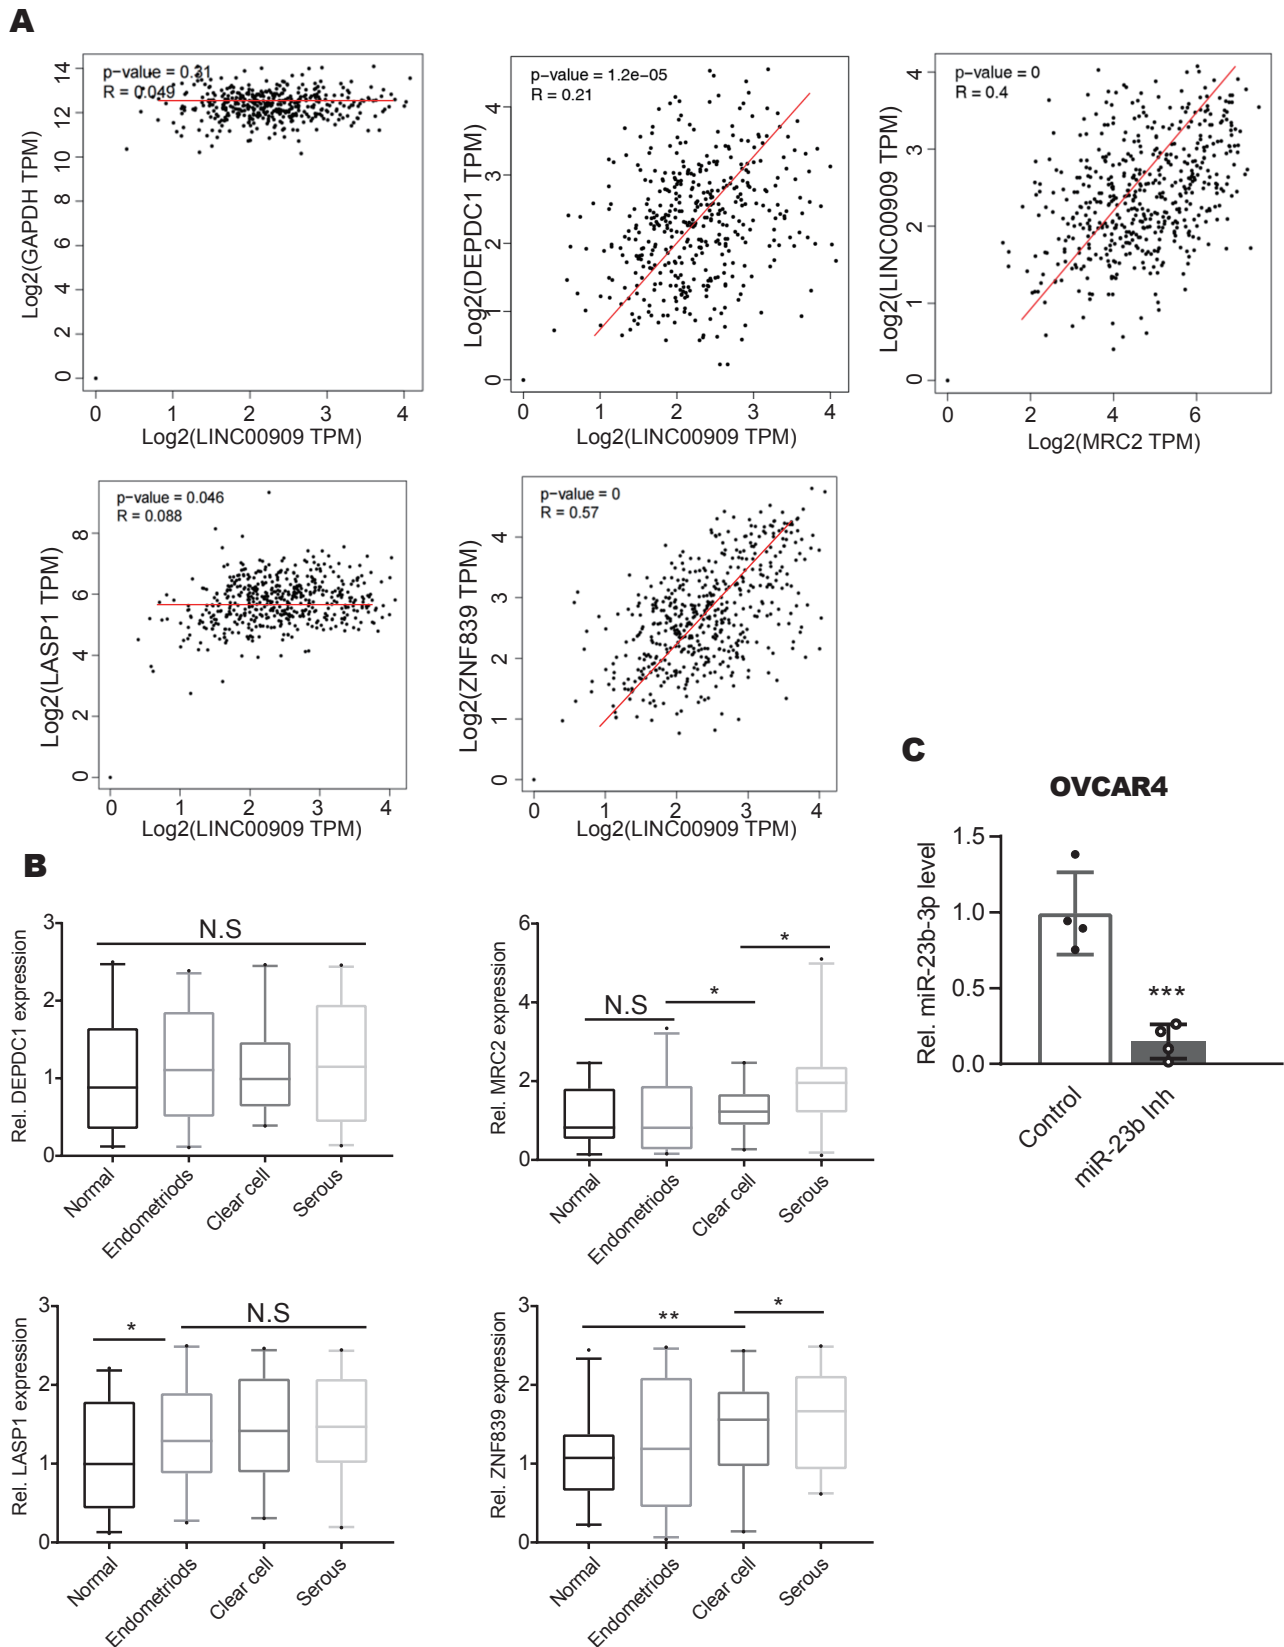

Fig. S5 LINC00909 achieves its biological functions in ovarian cancer via regulating MRC2

**A**

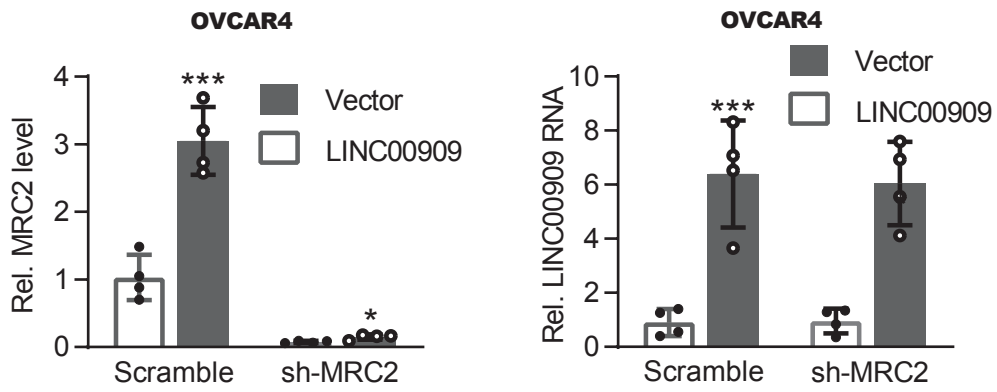

Supplement: f1 [file 5574130.f1.pdf]
